# Supplementary material for: Comparative Morphology, Transcription, and Proteomics Study Revealing the Key Molecular Mechanism of Camphor on the Potato Tuber Sprouting Effect
Source: MDPI journal article supplement (doi:10.3390/ijms18112280), 2017-10-30
Supplement: s1 [file s1]

**Table S6.** Primer sequences used in Quantitative RT-PCR for iTRAQ validation.

| ID                   | Gene                                    | Primer                                        |
|----------------------|-----------------------------------------|-----------------------------------------------|
| PGSC0003DMT400006894 | Uncharacterized protein                 | TGGTGGACAGAGTGAAGAA<br>CGAGTGTAGCATCGGAGTT    |
| PGSC0003DMT400003773 | Pathogenesis-related protein STH-2-like | CAACGACCACAATTTCCC<br>TCCAACACCACCATCTCC      |
| PGSC0003DMT400039734 | Protochlorophyllide reductase-like      | GGGATGCCTAAGGAGAAT<br>CGAACCGACAATGATGAG      |
| PGSC0003DMT400042741 | 4-alpha-glucanotransferase              | TTCTTCTGTAGCCCGTAT<br>AACTAGGTATCCTCCAACTC    |
| PGSC0003DMT400015734 | Heat shock protein 90-6                 | CAGTTTGTTTCATTCCCTAT<br>ATCTTGCCCTTCCTTATT    |
| PGSC0003DMT400037918 | Glutathione s-transferase               | GCCCATTTAGTCACAGAG<br>CAAGGAACTTAGCCCAGA      |
| PGSC0003DMT400005104 | Glutathione s-transferase               | ATGGAAGAATGGACCTCA<br>CCAAATGCTACGACGATC      |
| PGSC0003DMT400042214 | Ubiquitin-conjugating enzyme E2         | G TTCAGGAGGATCTAGTGTT<br>CAGAA TTGTGAGGACCAA  |
| PGSC0003DMT400090964 | Protein transport protein Sec61         | GTGGTAACGCTGTAGTAGGC<br>GTAGTAACGAATCCGATGAAG |
| PGSC0003DMT400033585 | 14-3-3 protein                          | TTGAACAGAAGGAGGAAT<br>GGTAGTAGCAGACGGAAC      |
| PGSC0003DMT400018083 | dnaJ protein homolog                    | TCAATACAAGGCGATAAATG<br>GCTGCTCCTCGTGTCTCA    |
| PGSC0003DMT400042739 | Glycoside hydrolase                     | TTCTTCTGTAGCCCGTAT<br>AACTAGGTATCCTCCAACTC    |
