# Supplementary material for: Comparative Morphology, Transcription, and Proteomics Study Revealing the Key Molecular Mechanism of Camphor on the Potato Tuber Sprouting Effect
Source: MDPI journal article supplement (doi:10.3390/ijms18112280), 2017-10-30
Supplement: s1 [file s1]

**Table S9.** Quantitative RT-PCR for RNA sequencing validation.

| ID                   | Gene                                                                         | Primer                                         |
|----------------------|------------------------------------------------------------------------------|------------------------------------------------|
| PGSC0003DMT400014674 | Elongation factor 1 alpha-like protein <i>EF1aL</i>                          | CTTGTACACCACGCTAAGGAG<br>GTCAATGCAAACCATTCCTTG |
| PGSC0003DMT400033236 | 4,4-dimethyl-9beta,19-cyclopropylsterol-4alpha-methyl<br>oxidase <i>SMO1</i> | GAGAGAACTGAGAATGGAGG<br>GTGCTTGATAGAGAAACACAAC |
| PGSC0003DMT400020648 | Cyclin D3 <i>CYCD3</i>                                                       | TGATAGGCTTAAACCTTGC<br>TAACAGATGTAGCCACTGAC    |
| PGSC0003DMT400064270 | Peroxidase <i>POD</i>                                                        | CACTGTCCCTGCTGTTC<br>TCCTGCCAATGATAGATTA       |
| PGSC0003DMT400023554 | Wax-ester synthase / diacylglycerol O-acyltransferase<br><i>WES</i>          | GTGTTGACCCGATTACCCA<br>CTTGTTTAGTGACAGCCTCTT   |
| PGSC0003DMT400028227 | Myb proto-oncogene transcription factor MYB48-like<br><i>MYB48</i>           | GACGACACTTTGCACCAAC<br>TCCAAGACAAGCCTACCTAAT   |
| PGSC0003DMT400014568 | General transcription factor IIE subunit 1-like <i>TFIIE</i>                 | AGGAAGGAGGGAGCAAA<br>AGGCAGCAATAAGAATGAG       |
| PGSC0003DMT400004046 | Snakin2 <i>SN2</i>                                                           | CTCCTTGCTCCTTCTCG<br>TAGCAAGGGCAAGTCTCAG       |
| PGSC0003DMT400019919 | Kip-related protein 4 <i>KRP4</i>                                            | AAAAGACAGAATCGGAGTT<br>GTCCTCTCTCTACCATCAAT    |
| PGSC0003DMT400056352 | WRKY transcription factor 75 <i>WRKY 75</i>                                  | CAGCATCATCGTCGTCAT<br>CATTAGTCCCAAGAACCC       |
| PGSC0003DMT400015017 | Transcription factor ATR2-like <i>ATR2</i>                                   | CTCATAGTGCGTCTCTCCA<br>AATCACACCTTCAGATCCAAT   |
| PGSC0003DMG400001550 | Pathogenesis-related protein STH-2 <i>STH-2</i><br>or TSI-1 protein          | AAAACCAGGCATGGAAC<br>ACGTGTAGACCTGATTCTTT      |
| PGSC0003DMT400020263 | Serine-rich protein <i>SRP</i>                                               | CCAAACACGGCACAAAGA<br>GGGACAGTGAACGGAGAA       |
